# Supplementary material for: Current understanding of articular cartilage lesions in femoroacetabular impingement syndrome
Source: PubMed Central journal article supplement — J Orthop Surg Res. 2024 Dec 30;19:886. doi: 10.1186/s13018-024-05322-6 (PMC11684245; doi:10.1186/s13018-024-05322-6), 2024-12-30
Supplement: 13018_2024_5322_MOESM2_ESM.pdf [file 13018_2024_5322_MOESM2_ESM.pdf]

| <b>Authors</b>           | <b>Begin</b> | <b>End</b> | <b>2003 - 2024</b> |
|--------------------------|--------------|------------|--------------------|
| Ganz, R                  | 2003         | 2006       |                    |
| Leunig, M                | 2003         | 2006       |                    |
| Beck, M                  | 2003         | 2008       |                    |
| Bittersohl, Bernd        | 2008         | 2012       |                    |
| Kim, Young-Jo            | 2008         | 2014       |                    |
| Werlen, Stefan           | 2009         | 2011       |                    |
| Mamisch, Tallal C        | 2009         | 2011       |                    |
| Siebenrock, Klaus A      | 2009         | 2013       |                    |
| Philippon, Marc J        | 2013         | 2016       |                    |
| Link, Thomas M           | 2015         | 2018       |                    |
| Tannast, Moritz          | 2017         | 2022       |                    |
| Majumdar, Sharmila       | 2018         | 2020       |                    |
| Samaan, Michael A        | 2018         | 2019       |                    |
| Zhang, Alan L            | 2018         | 2020       |                    |
| Souza, Richard B         | 2018         | 2020       |                    |
| Schmaranzer, Florian     | 2019         | 2024       |                    |
| Pascual-garrido, Cecilia | 2020         | 2024       |                    |
| Jimenez, Andrew E        | 2022         | 2024       |                    |
| Maldonado, David R       | 2022         | 2024       |                    |

| <b>Institutions</b>                    | <b>Begin</b> | <b>End</b> | <b>2003 - 2024</b> |
|----------------------------------------|--------------|------------|--------------------|
| University of Bern                     | 2003         | 2012       |                    |
| Harvard Medical School                 | 2008         | 2012       |                    |
| Harvard University                     | 2008         | 2012       |                    |
| Boston Children's Hospital             | 2009         | 2013       |                    |
| University of Duisburg Essen           | 2014         | 2017       |                    |
| University of Ottawa                   | 2015         | 2020       |                    |
| Ottawa Hospital Research Institute     | 2015         | 2020       |                    |
| Mayo Clinic                            | 2016         | 2020       |                    |
| University of California San Francisco | 2018         | 2024       |                    |
| University of Fribourg                 | 2021         | 2024       |                    |
